# Supplementary material for: Serum Starvation-Induced Voltage-Gated Potassium Channel Kv7.5 Expression and Its Regulation by Sp1 in Canine Osteosarcoma Cells
Source: MDPI journal article supplement (doi:10.3390/ijms15010977), 2014-01-10
Supplement: s1 [file s1]

## Supplementary Information

**Figure S1.** CCL-183 cells were arrested in the G<sub>0</sub>/G<sub>1</sub> phase and re-entered the S phase following serum deprivation (0% FBS) and re-addition (10% FBS). **(A)** Cell-cycle analysis with propidium iodide was performed using flow cytometry. The representative histograms show cells arrested in the G<sub>0</sub>/G<sub>1</sub> phase following serum deprivation (0, -10, -30, -44, -54, and -68 h) and cells that progressed into the S phase following serum re-addition (+14, +24, and +38 h); **(B)** The relative percentage distribution of the G<sub>0</sub>/G<sub>1</sub> and S phase was depicted using cells counted from flow cytometry in graphical form. Values are the mean  $\pm$  SEM of four independent flow cytometry assays. \*  $p < 0.05$  vs. 0 h; a,  $p < 0.01$  vs. -44 h; b,  $p < 0.01$  vs. -68 h; c,  $p < 0.05$  vs. -54 h; d,  $p < 0.05$  vs. -68 h.

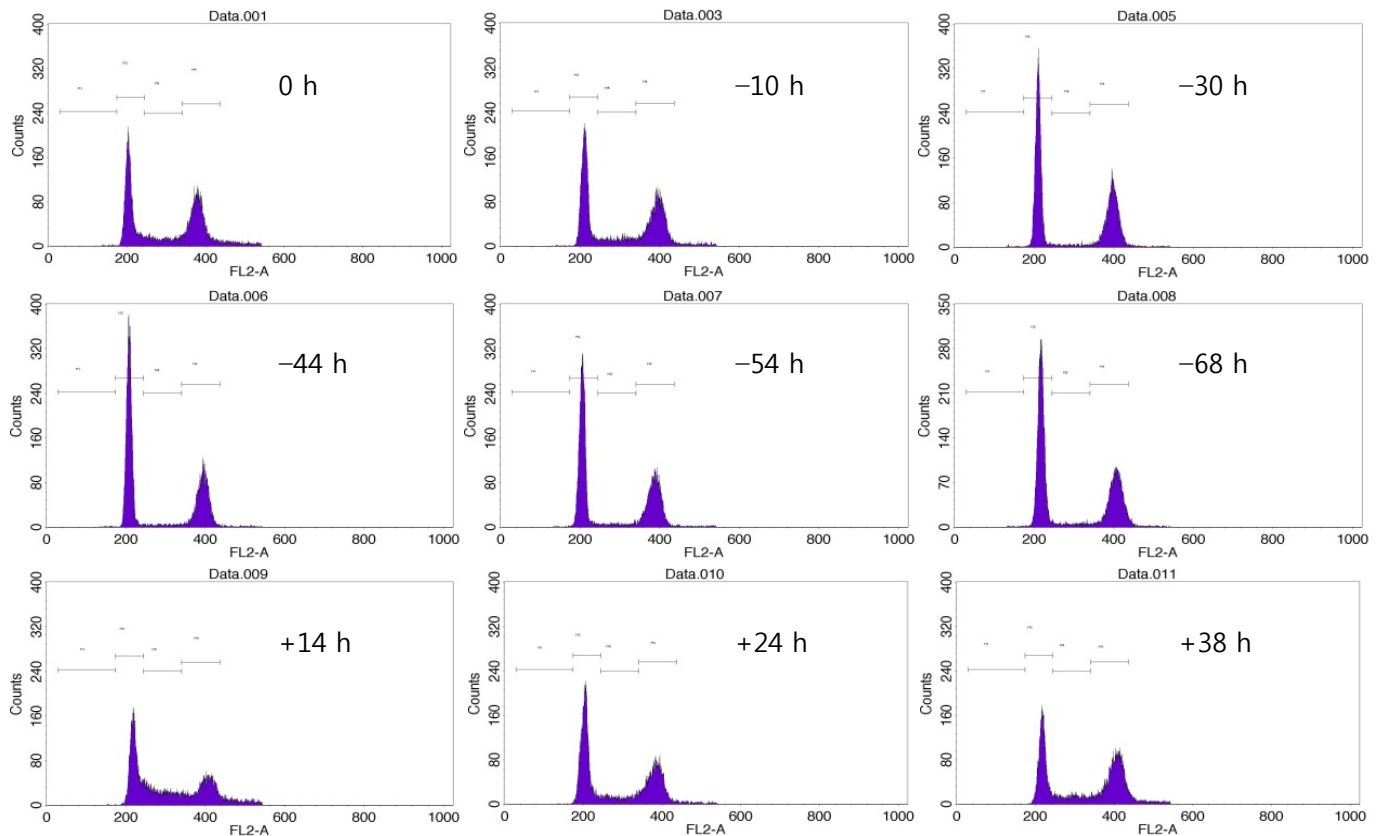

**(A)**

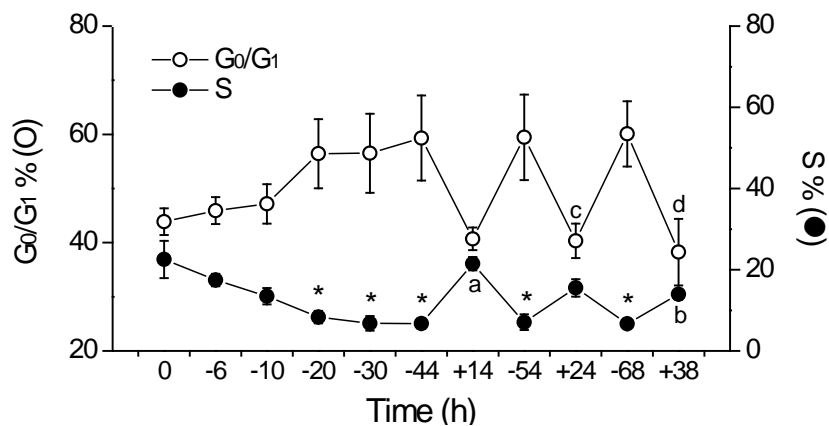

**(B)**
